# Supplementary material for: Evaluation of Glycerylphytate Crosslinked Semi- and Interpenetrated Polymer Membranes of Hyaluronic Acid and Chitosan for Tissue Engineering
Source: PubMed Central journal article supplement (PMC7697555; doi:10.3390/polym12112661), 2020-11-11
Supplement: polymers-12-02661-s001.pdf [file polymers-12-02661-s001.pdf]

# Evaluation of glycerylphytate crosslinked semi- and interpenetrated polymer membranes of hyaluronic acid and chitosan for tissue engineering

Ana Mora-Boza <sup>1,2, †</sup>, Elena López-Ruiz <sup>3, 4, 5, 6, ‡</sup>, María Luisa López-Donaire <sup>1, 2, \*</sup>, Gema Jiménez <sup>3, 4, 5, 6</sup>, María Rosa Aguilar <sup>1, 2</sup>, Juan Antonio Marchal <sup>3, 4, 6, 7</sup>, José Luis Pedraz <sup>2, 8</sup>, Blanca Vázquez-Lasa <sup>1, 2, \*</sup>, Julio San Román <sup>1, 2</sup>, Patricia Gálvez-Martín <sup>9</sup>

<sup>1</sup> Institute of Polymer Science and Technology, ICTP-CSIC. C/ Juan de la Cierva 3, 28006 Madrid, Spain.

<sup>2</sup> CIBER-BBN. Health Institute Carlos III, C/ Monforte de Lemos 3-5, Pabellón 11, 28029 Madrid, Spain.

<sup>3</sup> Biopathology and Regenerative Medicine Institute (IBIMER), Centre for Biomedical Research, University of Granada, Granada E-18100, Spain.

<sup>4</sup> Instituto de Investigación Biosanitaria de Granada (ibs.GRANADA), University Hospitals of Granada University of Granada, Granada E-18071, Spain.

<sup>5</sup> Department of Health Sciences, University of Jaén, 23071 Jaén, Spain.

<sup>6</sup> Excellence Research Unit "Modeling Nature" (MNat), University of Granada, Granada E-18016, Spain

<sup>7</sup> Department of Human Anatomy and Embryology, Faculty of Medicine, University of Granada, Granada E-18016, Spain.

<sup>8</sup> NanoBioCel Group, Laboratory of Pharmaceutics, University of the Basque Country (UPV/EHU), School of Pharmacy, Paseo de la Universidad 7, Vitoria- Gasteiz 01006, Spain.

<sup>9</sup> R&D Human Health, Bioibérica S.A.U., Barcelona, Spain.

## Supplementary information

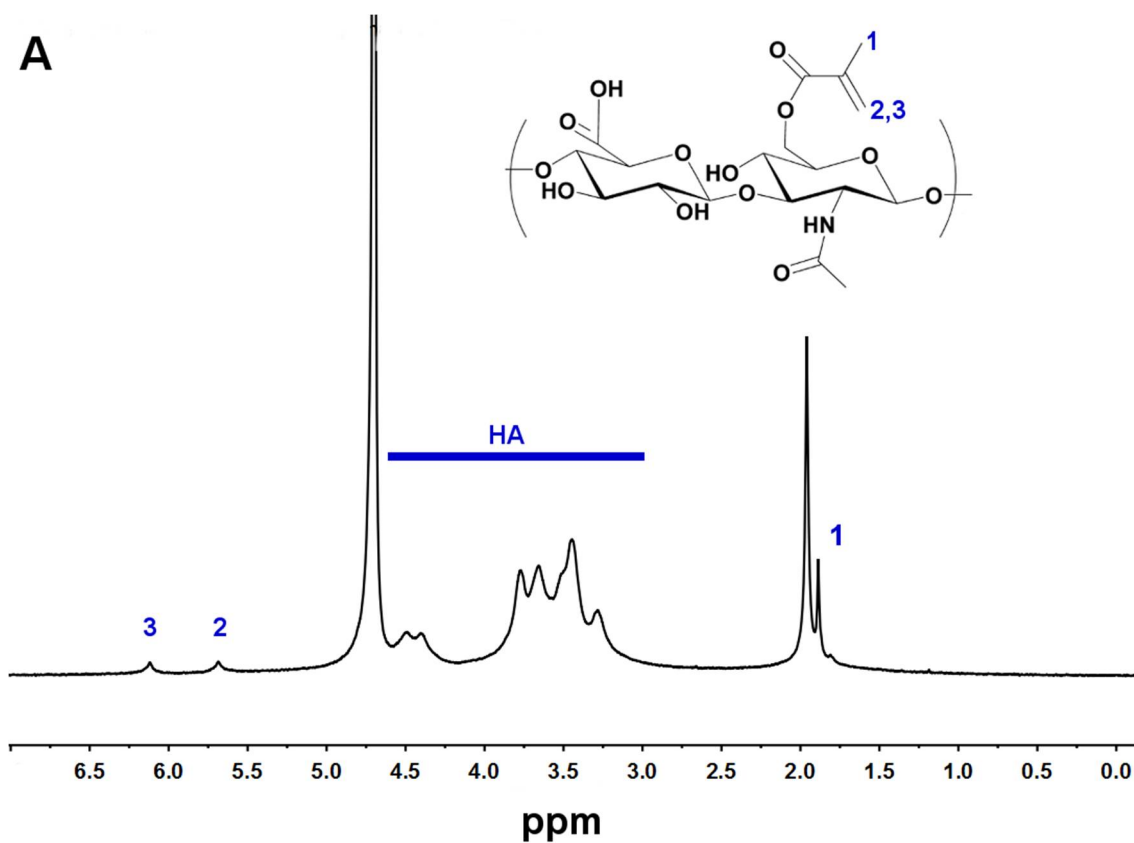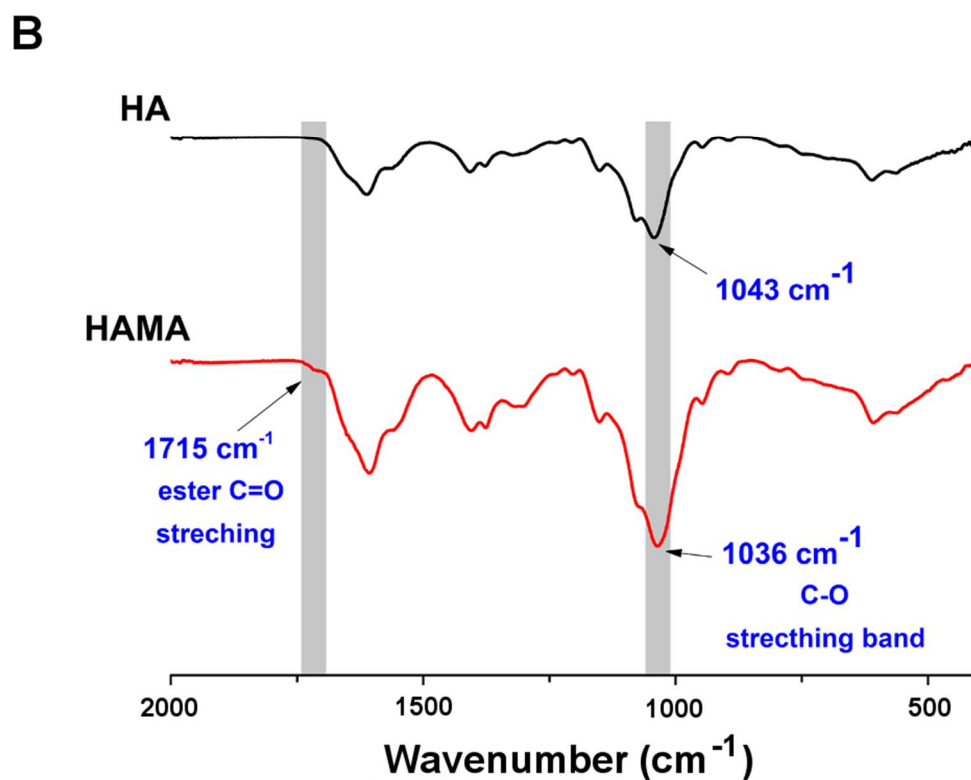

**Figure. S1.** (A)  $^1\text{H-NMR}$  spectrum of HAMA with 4.5% methacrylation degree

in D<sub>2</sub>O, and (B) ATR-FTIR spectra of HA and HAMA.

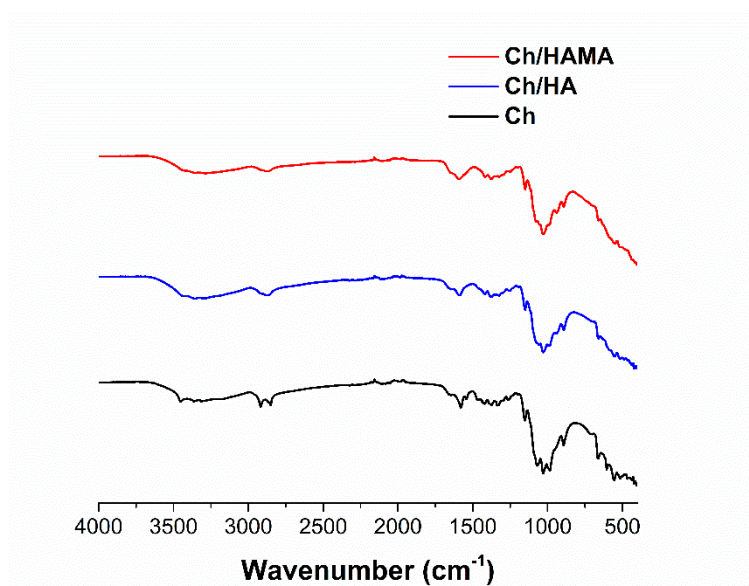

**Figure. S2.** ATR-FTIR spectra of Ch, Ch/HA, and Ch/HAMA membranes
